# Supplementary material
Source: Springer Nature journal article supplement (https://www.springermedizin.de/resource/supplementary/12967_2013_1546_MOESM7_ESM.pdf/9574316)

**A**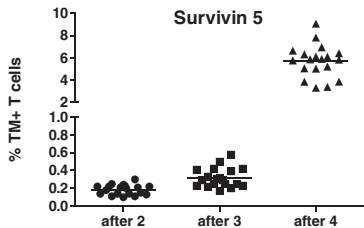**7 days after 4th stimulation**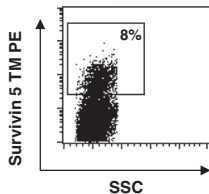**7 days after Macs enrichment and feeder mix**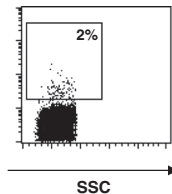**B**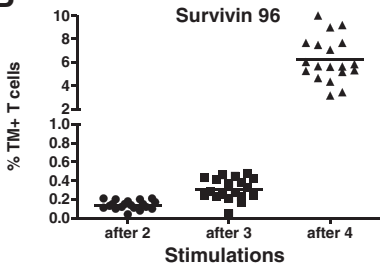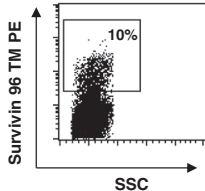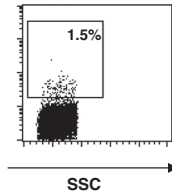

Supplement: MOESM7 [file 9574316]
